# Supplementary material
Source: ML conference proceedings conference paper supplement (https://www.ecva.net/papers/eccv_2020/papers_ECCV/html/123730307_ECCV_2020_paper.php)
Supplement: Supplementary file 1 [file 123730307-supp.pdf]

# Supplementary Materials: Patch-wise Attack for Fooling Deep Neural Network

Lianli Gao<sup>1</sup>, Qilong Zhang<sup>1</sup>, Jingkuan Song<sup>1</sup>, Xianglong Liu<sup>2</sup>, and Heng Tao Shen<sup>1\*</sup>

<sup>1</sup> Center for Future Media and School of Computer Science and Engineering,  
University of Electronic Science and Technology of China, China

<sup>2</sup> Beihang University, China  
qilong.zhang@std.uestc.edu.cn

## A Appendix

Here we discuss the influence of project factor  $\gamma$  and iteration  $T$ , we consider 12 models to do these experiments:

- NT: Inc-v3 [4], Inc-v4 [3], IncRes-v2 [3], Res-152 [1] and Dense-161 [2].
- EAT [5]: Inc-v3<sub>adv</sub>, Inc-v3<sub>ens3</sub>, Inc-v3<sub>ens4</sub> and IncRes<sub>ens</sub>.
- FD [6]: ResNeXt<sub>DA</sub>, Res152<sub>B</sub> and Res152<sub>D</sub>.

Then we report the results for different project factor  $\gamma$  settings in Sec. A.1 and the influence of different iterations  $T$  in Sec. A.2.

### A.1 Selection of project factor $\gamma$

In this section, we show the results of difference project factor  $\gamma$  settings. For the following tables, the amplification factor  $\beta$  and project kernel  $W_p$  are fixed to the same settings mentioned in our paper. As shown in Tab. 1,2,3,4,5,6, setting the project factor  $\gamma$  to  $\epsilon/T \cdot \beta$  is the best choice in most cases. Besides, it is better not to use large project factor for attack methods with input diversity strategy, and if we use Res152<sub>B</sub> as our substitute model to attack against feature denoising models, setting  $\gamma$  to 1.0 is better.

### A.2 The number of iteration $T$

In this section, we discuss the influence of different iteration  $T$ . Here step size is set to  $\epsilon/T$ , amplification factor  $\beta$  is set to  $T$ , and project factor  $\gamma$  is set to  $\epsilon/T \cdot \beta$ . From the results of Tab. 7,8,9, we observe that when the iteration  $T$  exceeds 10, further increasing it will not bring significant improvement. Besides, the computational cost is proportional to  $T$ . Since our PI-FGSM is based on FGSM, we want to highlight “fast”. Therefore we do not consider a bigger  $T$  and just set  $T$  to 10 in our paper.

---

\* Corresponding author

**Table 1.** The average success rate(%) of non-targeted attacks in different project factor  $\gamma$  settings. Here we use Inc-v3 to generate adversarial examples by PI-FGSM.

| Inc-v3  | $\gamma$ | Inc-v4      | Res-152     | IncRes-v2   | Dense-161   | Inc-v3 <sub>adv</sub> | Inc-v3 <sub>ens3</sub> | Inc-v3 <sub>ens4</sub> | IncRes <sub>ens</sub> | Avg         |
|---------|----------|-------------|-------------|-------------|-------------|-----------------------|------------------------|------------------------|-----------------------|-------------|
| PI-FGSM | 1.0      | 39.2        | 28.7        | 33.8        | 36.5        | 24.2                  | 13.7                   | 12.8                   | 7.1                   | 24.5        |
|         | 2.0      | 42.1        | 29.6        | 37.9        | 38.2        | 25.2                  | 13.5                   | 14.0                   | 8.4                   | 26.1        |
|         | 3.0      | 42.1        | 28.2        | 35.2        | 38.9        | 25.0                  | 16.0                   | 14.2                   | 8.0                   | 26.0        |
|         | 4.0      | 42.8        | 29.9        | 39.7        | 40.8        | 24.9                  | 15.6                   | 14.8                   | 9.0                   | 27.2        |
|         | 5.0      | 46.1        | 31.3        | 40.3        | 42.7        | 26.1                  | 16.4                   | 17.0                   | 8.1                   | 28.5        |
|         | 6.0      | 48.4        | 31.8        | 40.9        | 44.4        | 27.1                  | 18.1                   | 16.7                   | 9.8                   | 29.7        |
|         | 7.0      | 50.9        | 34.7        | 44.0        | 45.5        | 26.5                  | 18.8                   | 17.9                   | 10.0                  | 31.0        |
|         | 8.0      | 53.1        | 36.2        | 45.5        | 46.6        | 28.5                  | 20.2                   | 19.7                   | 11.7                  | 32.7        |
|         | 9.0      | 52.8        | 35.3        | 45.3        | 49.8        | 28.7                  | 21.6                   | 21.7                   | 13.3                  | 33.6        |
|         | 10.0     | 53.2        | 36.9        | 48.8        | 52.5        | 28.5                  | 22.1                   | 23.3                   | 14.8                  | 35.0        |
|         | 11.0     | 55.8        | 39.9        | 49.6        | 53.4        | 30.0                  | 26.7                   | 27.2                   | 17.0                  | 37.5        |
|         | 12.0     | 55.7        | 40.9        | 50.8        | 55.3        | 29.8                  | 28.1                   | 29.7                   | 18.7                  | 38.6        |
|         | 13.0     | 57.4        | 41.7        | 50.3        | 55.6        | 32.1                  | 31.2                   | 31.5                   | 22.7                  | 40.3        |
|         | 14.0     | 57.8        | 44.7        | 51.4        | 58.3        | 35.3                  | 34.1                   | 35.0                   | 25.8                  | 42.8        |
|         | 15.0     | 58.5        | 44.3        | 52.3        | 59.2        | 38.6                  | 37.1                   | 36.8                   | 26.9                  | 44.2        |
|         | 16.0     | <b>59.8</b> | <b>46.9</b> | <b>52.7</b> | <b>60.2</b> | <b>40.7</b>           | <b>40.2</b>            | <b>39.7</b>            | <b>29.6</b>           | <b>46.2</b> |

**Table 2.** The average success rate(%) of non-targeted attacks in different project factor  $\gamma$  settings. Here we use Inc-v3 to generate adversarial examples by DPI-FGSM.

| Inc-v3   | $\gamma$ | Inc-v4      | Res-152     | IncRes-v2   | Dense-161   | Inc-v3 <sub>adv</sub> | Inc-v3 <sub>ens3</sub> | Inc-v3 <sub>ens4</sub> | IncRes <sub>ens</sub> |
|----------|----------|-------------|-------------|-------------|-------------|-----------------------|------------------------|------------------------|-----------------------|
| DPI-FGSM | 1.0      | 72.9        | 48.6        | 64.0        | 49.5        | 24.7                  | 15.5                   | 14.4                   | 8.4                   |
|          | 2.0      | 73.0        | 50.4        | 65.2        | 54.7        | 26.2                  | 15.4                   | 15.6                   | 8.6                   |
|          | 3.0      | <b>73.2</b> | <b>50.9</b> | <b>66.6</b> | 60.6        | 26.4                  | 16.7                   | 17.7                   | 9.1                   |
|          | 4.0      | 70.1        | 49.0        | 62.1        | 60.3        | 25.9                  | 17.5                   | 15.8                   | 9.1                   |
|          | 5.0      | 66.0        | 48.7        | 59.4        | 61.1        | 27.8                  | 17.3                   | 19.1                   | 10.6                  |
|          | 6.0      | 62.7        | 47.9        | 54.7        | 61.6        | 27.7                  | 18.0                   | 19.9                   | 9.5                   |
|          | 7.0      | 61.8        | 46.0        | 52.0        | <b>61.8</b> | 28.8                  | 20.8                   | 20.4                   | 11.4                  |
|          | 8.0      | 58.2        | 45.5        | 47.8        | 59.2        | 30.4                  | 21.8                   | 23.8                   | 12.0                  |
|          | 9.0      | 55.2        | 43.7        | 47.8        | 58.7        | 29.9                  | 23.2                   | 23.4                   | 13.0                  |
|          | 10.0     | 53.9        | 44.6        | 46.2        | 59.1        | 31.1                  | 26.0                   | 26.4                   | 16.5                  |
|          | 11.0     | 53.8        | 44.3        | 44.6        | 57.6        | 31.2                  | 26.9                   | 29.7                   | 17.9                  |
|          | 12.0     | 55.2        | 42.5        | 45.3        | 58.7        | 33.3                  | 30.4                   | 32.7                   | 19.0                  |
|          | 13.0     | 52.2        | 43.5        | 43.5        | 58.1        | 34.8                  | 33.4                   | 34.6                   | 22.9                  |
|          | 14.0     | 55.3        | 41.7        | 40.8        | 59.0        | 37.0                  | 35.0                   | 35.9                   | 26.4                  |
|          | 15.0     | 52.1        | 40.9        | 41.1        | 56.8        | 40.8                  | 39.8                   | 40.1                   | 28.6                  |
|          | 16.0     | 51.9        | 43.5        | 41.5        | 57.9        | <b>42.3</b>           | <b>40.9</b>            | <b>41.6</b>            | <b>31.2</b>           |

**Table 3.** The average success rate(%) of non-targeted attacks in different project factor  $\gamma$  settings. Here we use Inc-v3 to generate adversarial examples by MPI-FGSM.

| Inc-v3   | $\gamma$ | Inc-v4      | Res-152     | IncRes-v2   | Dense-161   | Avg         |
|----------|----------|-------------|-------------|-------------|-------------|-------------|
| MPI-FGSM | 1.0      | 56.2        | 41.2        | 54.5        | 46.1        | 49.5        |
|          | 2.0      | 57.2        | 40.2        | 54.9        | 48.0        | 50.1        |
|          | 3.0      | 57.6        | 41.2        | 57.0        | 46.0        | 50.5        |
|          | 4.0      | 57.5        | 42.1        | 57.7        | 46.8        | 51.0        |
|          | 5.0      | 58.8        | 42.0        | 56.2        | 47.2        | 51.1        |
|          | 6.0      | 58.7        | 41.9        | 57.4        | 47.5        | 51.4        |
|          | 7.0      | 57.7        | 43.5        | 57.2        | 48.4        | 51.7        |
|          | 8.0      | 59.1        | 42.4        | 56.3        | 50.8        | 52.2        |
|          | 9.0      | 58.7        | 42.4        | 56.3        | 48.6        | 51.5        |
|          | 10.0     | 60.1        | 43.3        | 57.9        | 49.1        | 52.6        |
|          | 11.0     | 60.1        | 43.4        | 59.5        | 51.9        | 53.7        |
|          | 12.0     | 62.6        | 44.4        | 59.5        | 52.6        | 54.8        |
|          | 13.0     | 62.6        | 45.3        | 59.7        | 55.7        | 55.8        |
|          | 14.0     | 64.0        | 47.7        | <b>60.9</b> | 57.7        | 57.6        |
|          | 15.0     | <b>64.1</b> | 48.1        | 60.4        | 59.0        | 57.9        |
|          | 16.0     | <b>64.1</b> | <b>50.2</b> | 59.4        | <b>60.4</b> | <b>58.5</b> |

**Table 4.** The average success rate(%) of non-targeted attacks in different project factor  $\gamma$  settings. Here we use Inc-v3 to generate adversarial examples by TPI-FGSM.

| Inc-v3   | $\gamma$ | Inc-v3 <sub>adv</sub> | Inc-v3 <sub>ens3</sub> | Inc-v3 <sub>ens4</sub> | IncRes <sub>ens</sub> | Avg         |
|----------|----------|-----------------------|------------------------|------------------------|-----------------------|-------------|
| TPI-FGSM | 1.0      | 32.8                  | 29.7                   | 31.0                   | 20.9                  | 28.6        |
|          | 2.0      | 32.0                  | 31.2                   | 31.6                   | 22.2                  | 29.3        |
|          | 3.0      | 34.0                  | 31.4                   | 32.2                   | 23.0                  | 30.2        |
|          | 4.0      | 34.0                  | 32.7                   | 34.0                   | 22.6                  | 30.8        |
|          | 5.0      | 34.9                  | 34.3                   | 34.7                   | 23.4                  | 31.8        |
|          | 6.0      | 35.3                  | 34.7                   | 33.6                   | 23.1                  | 31.7        |
|          | 7.0      | 35.8                  | 35.8                   | 36.1                   | 24.4                  | 33.0        |
|          | 8.0      | 37.9                  | 36.4                   | 37.5                   | 25.9                  | 34.4        |
|          | 9.0      | 36.4                  | 37.0                   | 38.3                   | 26.5                  | 34.6        |
|          | 10.0     | 38.6                  | 38.0                   | 38.2                   | 26.6                  | 35.4        |
|          | 11.0     | 38.0                  | 40.9                   | 40.3                   | 27.1                  | 36.6        |
|          | 12.0     | 40.4                  | 41.6                   | 40.2                   | 28.9                  | 37.8        |
|          | 13.0     | 41.8                  | 42.8                   | 43.3                   | 29.7                  | 39.4        |
|          | 14.0     | 43.8                  | 44.0                   | 44.7                   | 32.9                  | 41.4        |
|          | 15.0     | 46.6                  | 46.6                   | 47.0                   | 34.8                  | 43.8        |
|          | 16.0     | <b>50.2</b>           | <b>48.8</b>            | <b>50.8</b>            | <b>35.2</b>           | <b>46.3</b> |

**Table 5.** The average success rate(%) of non-targeted attacks in different project factor  $\gamma$  settings. Here we use Inc-v3 to generate adversarial examples by DMPI-FGSM.

| Inc-v3    | $\gamma$ | Inc-v4      | Res-152     | IncRes-v2   | Dense-161   | Avg         |
|-----------|----------|-------------|-------------|-------------|-------------|-------------|
| DMPI-FGSM | 1.0      | 81.2        | 61.8        | 76.0        | 61.1        | 70.0        |
|           | 2.0      | 81.7        | 64.5        | <b>77.3</b> | 63.6        | 71.8        |
|           | 3.0      | <b>81.9</b> | <b>65.1</b> | <b>77.3</b> | 66.0        | <b>72.6</b> |
|           | 4.0      | 79.7        | 63.1        | 75.7        | <b>67.9</b> | 71.6        |
|           | 5.0      | 76.3        | 60.6        | 71.7        | 66.0        | 68.7        |
|           | 6.0      | 74.4        | 56.6        | 69.1        | 67.1        | 66.8        |
|           | 7.0      | 69.5        | 55.6        | 64.0        | 63.6        | 63.2        |
|           | 8.0      | 66.1        | 52.9        | 59.1        | 65.4        | 60.9        |
|           | 9.0      | 63.6        | 51.0        | 58.4        | 64.0        | 59.3        |
|           | 10.0     | 62.2        | 51.1        | 56.1        | 63.5        | 58.2        |
|           | 11.0     | 63.6        | 52.0        | 56.7        | 64.0        | 59.1        |
|           | 12.0     | 61.8        | 49.4        | 56.0        | 64.7        | 58.0        |
|           | 13.0     | 62.9        | 50.1        | 55.6        | 64.8        | 58.4        |
|           | 14.0     | 62.2        | 50.5        | 54.1        | 63.4        | 57.6        |
|           | 15.0     | 60.4        | 49.5        | 53.9        | 62.6        | 56.6        |
|           | 16.0     | 61.4        | 49.7        | 54.7        | 63.8        | 57.4        |

**Table 6.** The average success rate(%) of non-targeted attacks in different project factor  $\gamma$  settings. Here we use Res152<sub>B</sub> (“\*” indicates white-box attacks) to generate adversarial examples by PI-FGSM.

| Res152 <sub>B</sub> | $\gamma$ | ResNeXt <sub>DA</sub> | Res152 <sub>B</sub> | Res152 <sub>D</sub> | Avg         |
|---------------------|----------|-----------------------|---------------------|---------------------|-------------|
| PI-FGSM             | 1.0      | 62.0                  | <b>88.6*</b>        | 61.5                | <b>70.7</b> |
|                     | 2.0      | <b>62.1</b>           | 88.2*               | 61.6                | 70.6        |
|                     | 3.0      | 61.8                  | 87.7*               | <b>62.0</b>         | 70.5        |
|                     | 4.0      | 61.5                  | 87.1*               | 61.6                | 70.0        |
|                     | 5.0      | 60.0                  | 85.4*               | 58.8                | 68.1        |
|                     | 6.0      | 56.8                  | 84.0*               | 56.0                | 65.6        |
|                     | 7.0      | 55.0                  | 82.1*               | 53.4                | 63.5        |
|                     | 8.0      | 53.4                  | 80.7*               | 50.8                | 61.6        |
|                     | 9.0      | 51.9                  | 79.6*               | 49.0                | 60.2        |
|                     | 10.0     | 50.9                  | 78.7*               | 48.8                | 59.5        |
|                     | 11.0     | 51.3                  | 78.2*               | 48.6                | 59.4        |
|                     | 12.0     | 50.8                  | 78.0*               | 48.2                | 59.0        |
|                     | 13.0     | 50.2                  | 77.8*               | 48.0                | 58.7        |
|                     | 14.0     | 50.3                  | 77.8*               | 47.7                | 58.6        |
|                     | 15.0     | 50.2                  | 77.7*               | 47.7                | 58.5        |
|                     | 16.0     | 50.2                  | 77.7*               | 47.7                | 58.5        |

**Table 7.** The average success rate(%) of non-targeted attacks in different iteration  $T$  against NT. Here we use Inc-v3 to generate adversarial examples by PI-FGSM.

| Inc-v3  | iteration $T$ | Inc-v4      | Res-152     | IncRes-v2   | Dense-161   | Avg         |
|---------|---------------|-------------|-------------|-------------|-------------|-------------|
| PI-FGSM | 5             | <b>60.9</b> | 46.3        | <b>54.8</b> | 58.9        | <b>55.2</b> |
|         | 10            | 59.8        | 46.9        | 52.7        | 60.2        | 54.9        |
|         | 15            | 57.3        | 46.3        | 51.2        | 60.1        | 53.7        |
|         | 20            | 57.6        | 46.6        | 50.8        | 60.6        | 53.9        |
|         | 25            | 58.1        | <b>47.2</b> | 49.7        | <b>61.3</b> | 54.1        |
|         | 30            | 58.6        | 46.0        | 50.0        | 60.7        | 53.8        |

**Table 8.** The average success rate(%) of non-targeted attacks in different iteration  $T$  against EAT. Here we use Inc-v3 to generate adversarial examples by PI-FGSM.

| Inc-v3  | iteration $T$ | Inc-v3 <sub>adv</sub> | Inc-v3 <sub>ens3</sub> | Inc-v3 <sub>ens4</sub> | IncRes <sub>ens</sub> | Avg         |
|---------|---------------|-----------------------|------------------------|------------------------|-----------------------|-------------|
| PI-FGSM | 5             | 39.4                  | 33.6                   | 33.8                   | 24.7                  | 23.0        |
|         | 10            | 40.7                  | 40.2                   | 39.7                   | 29.6                  | 27.4        |
|         | 15            | <b>40.8</b>           | 39.7                   | 40.0                   | 29.0                  | 27.2        |
|         | 20            | 40.5                  | 40.6                   | 41.3                   | 30.1                  | 28.0        |
|         | 25            | 39.9                  | <b>41.3</b>            | <b>41.5</b>            | 29.9                  | 28.2        |
|         | 30            | 40.1                  | 41.1                   | 40.6                   | <b>31.4</b>           | <b>28.3</b> |

**Table 9.** The average success rate(%) of non-targeted attacks in different iteration  $T$  against FD. Here we use Res152<sub>B</sub> (“\*” indicates white-box attacks) to generate adversarial examples by PI-FGSM.

| Res152 <sub>B</sub> | iteration $T$ | ResNeXt <sub>DA</sub> | Res152 <sub>B</sub> | Res152 <sub>D</sub> | Avg         |
|---------------------|---------------|-----------------------|---------------------|---------------------|-------------|
| PI-FGSM             | 5             | 60.0                  | 86.8*               | 60.2                | 69.0        |
|                     | 10            | 61.8                  | 88.6*               | 61.5                | 70.6        |
|                     | 15            | 62.6                  | 89.3*               | 61.7                | 71.2        |
|                     | 20            | <b>62.9</b>           | 89.5*               | 61.9                | <b>71.5</b> |
|                     | 25            | 62.8                  | 89.5*               | <b>62.1</b>         | <b>71.5</b> |
|                     | 30            | 62.8                  | <b>89.8*</b>        | 61.5                | 71.4        |

## References

1. He, K., Zhang, X., Ren, S., Sun, J.: Deep residual learning for image recognition. In: CVPR (2016) 1
2. Huang, G., Liu, Z., van der Maaten, L., Weinberger, K.Q.: Densely connected convolutional networks. In: CVPR (2017) 1
3. Szegedy, C., Ioffe, S., Vanhoucke, V., Alemi, A.A.: Inception-v4, inception-resnet and the impact of residual connections on learning. In: AAAI (2017) 1
4. Szegedy, C., Vanhoucke, V., Ioffe, S., Shlens, J., Wojna, Z.: Rethinking the inception architecture for computer vision. In: CVPR (2016) 1
5. Tramèr, F., Kurakin, A., Papernot, N., Goodfellow, I.J., Boneh, D., McDaniel, P.D.: Ensemble adversarial training: attacks and defenses. In: ICLR (2018) 1
6. Xie, C., Wu, Y., van der Maaten, L., Yuille, A.L., He, K.: Feature denoising for improving adversarial robustness. In: CVPR (2019) 1
